# Supplementary material
Source: PubMed Central journal article supplement (PMC7057694)
Supplement: ao9b03852_si_001.pdf [file ao9b03852_si_001.pdf]

# Hyaluronic acid-Cellulose Composites as Patches for Minimizing Bacterial Infections

*Kelsey M. Lopez<sup>a</sup>, Sudhir Ravula<sup>a,b</sup>, Rocío L. Pérez<sup>a</sup>, Caitlan E. Ayala<sup>a</sup>, Jack N. Losso<sup>c</sup>, Marlene  
E. Janes<sup>c</sup>, Isiah M. Warner<sup>a\*</sup>*

a Department of Chemistry, Louisiana State University, Baton Rouge, Louisiana 70803, United  
States

b Department of Oral and Craniofacial Biology, Louisiana State University Health Science,  
School of Dentistry, New Orleans, Louisiana 70119, United States

c Department of Food Sciences, Louisiana State University, Baton Rouge, Louisiana 70803,  
United States

**Keywords:** Hyaluronic acid; cellulose; GUMBOS; ionic liquids

Supplementary Information

Removal and Recovery of [Bmim][Cl]

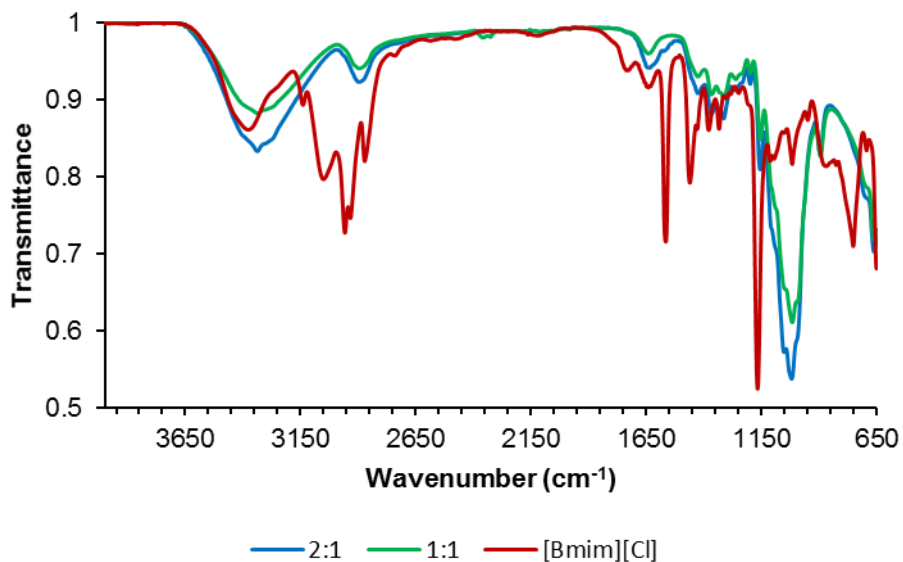

**SI Figure 1.** FT-IR spectra of 1:1 composite and 2:1 composite to ensure complete removal of [Bmim][Cl].

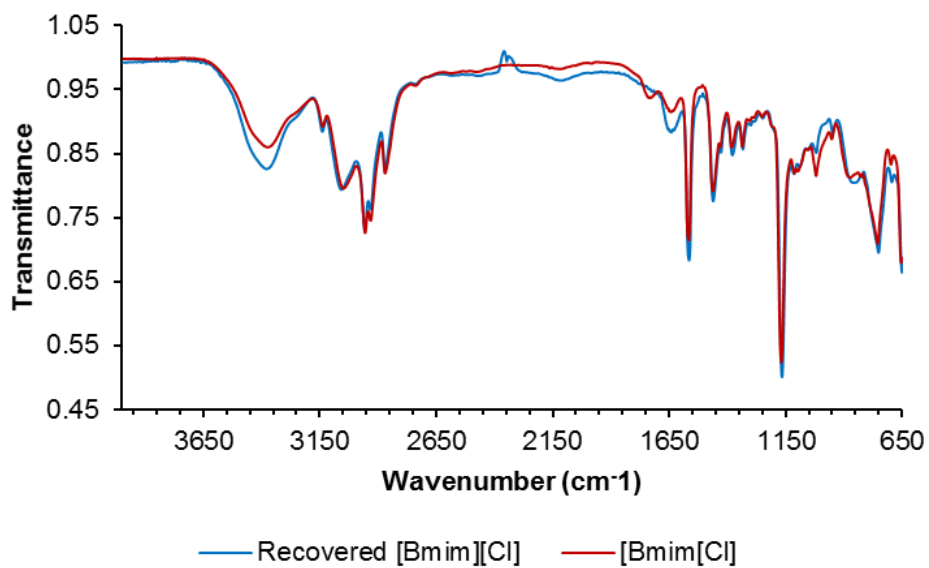

**SI Figure 2.** FT-IR spectra of recovered [Bmim][Cl] versus [Bmim][Cl].

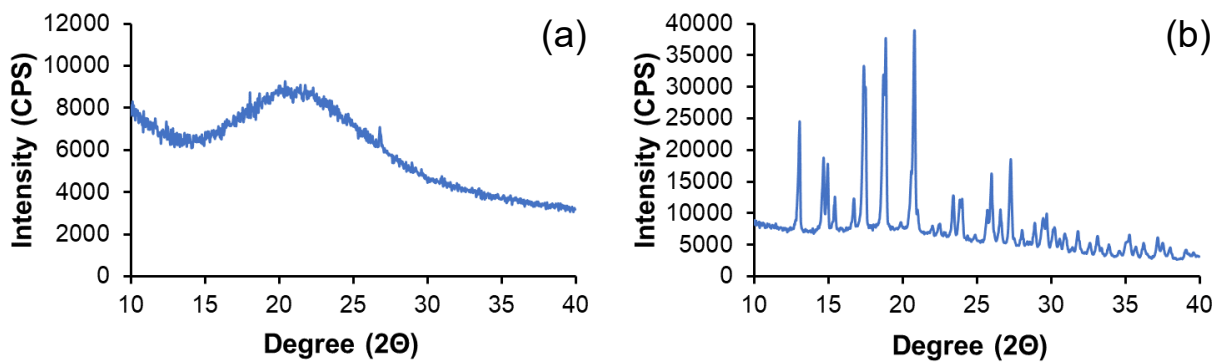

**SI Figure 3.** Powder XRD of [CHX][Ceph] (a), and [CHX][Oxa] (b).

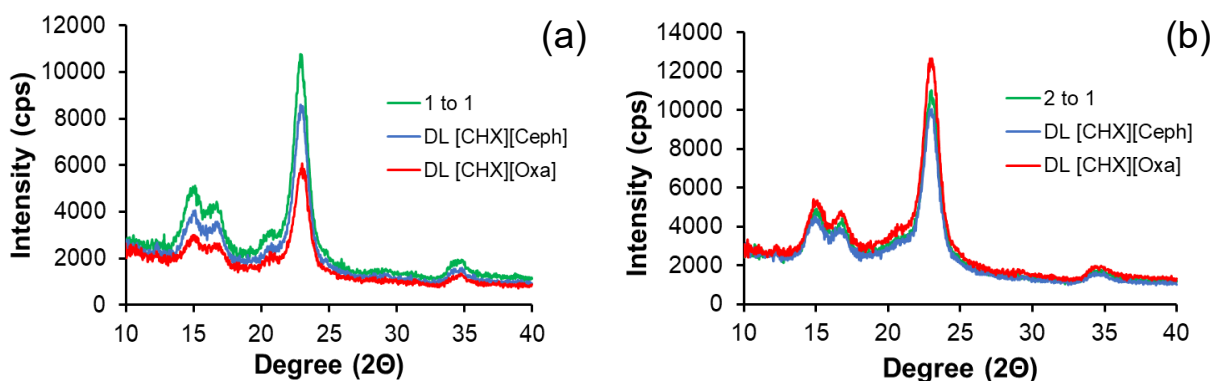

**SI Figure 4.** XRD of plain composites and drug-loaded (DL) composites; 1:1 composites (a) and 2:1 composites (b). Composites were drug-loaded with 100  $\mu$ M.

**SI Table 1.** Crystallinity indices for drug-loaded (DL) 1:1 and 2:1 composites.

| Materials          | Crystallinity Index (%) |
|--------------------|-------------------------|
| 1:1 DL [CHX][Ceph] | 78.1                    |
| 1:1 DL [CHX][Oxa]  | 75.3                    |
| 2:1 DL [CHX][Ceph] | 75.9                    |
| 2:1 DL [CHX][Oxa]  | 77.9                    |

Composites were drug-loaded with 100  $\mu$ M.

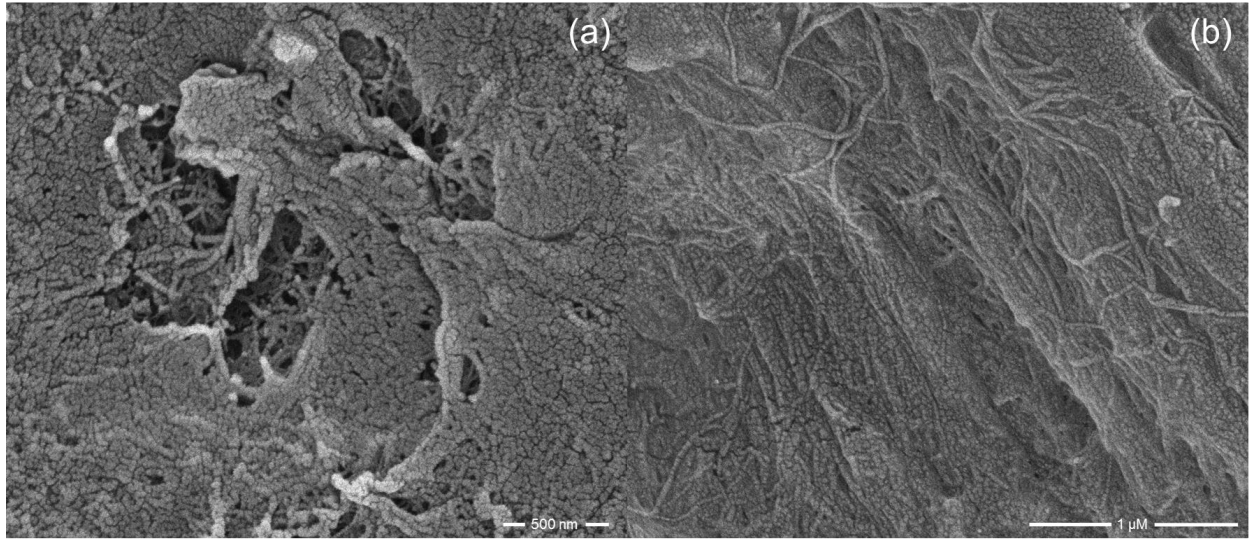

**SI Figure 5.** 50,000X SEM images of 1:1 composite (a), and [CHX][Ceph] drug loaded 1:1 composite (b).

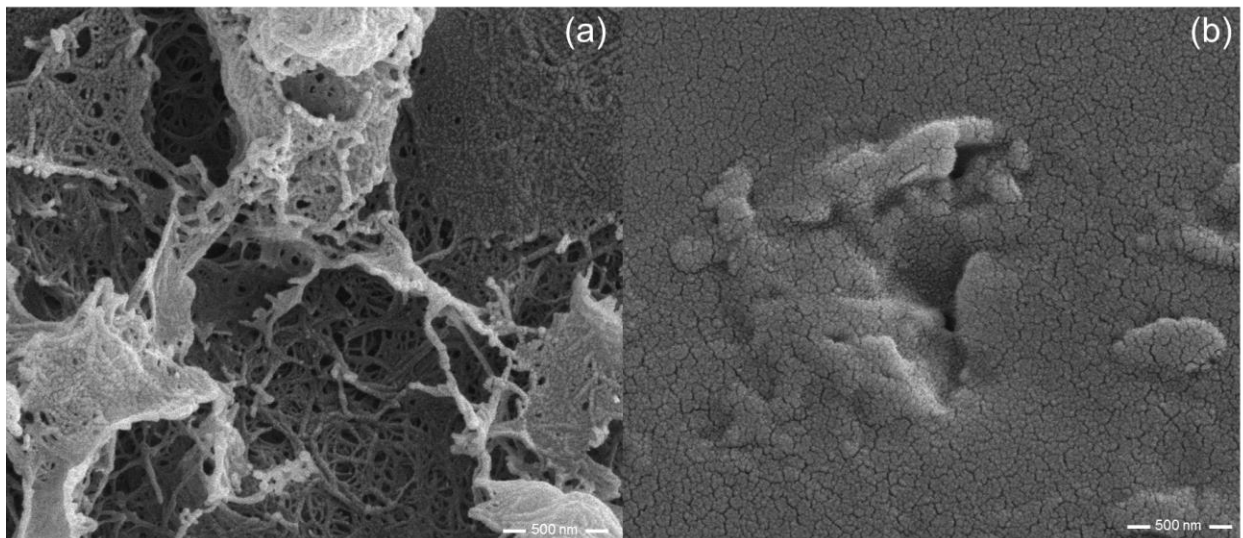

**SI Figure 6.** 50,000X SEM images of 2:1 composite (a), and [CHX][Ceph] drug loaded 2:1 composite (b).

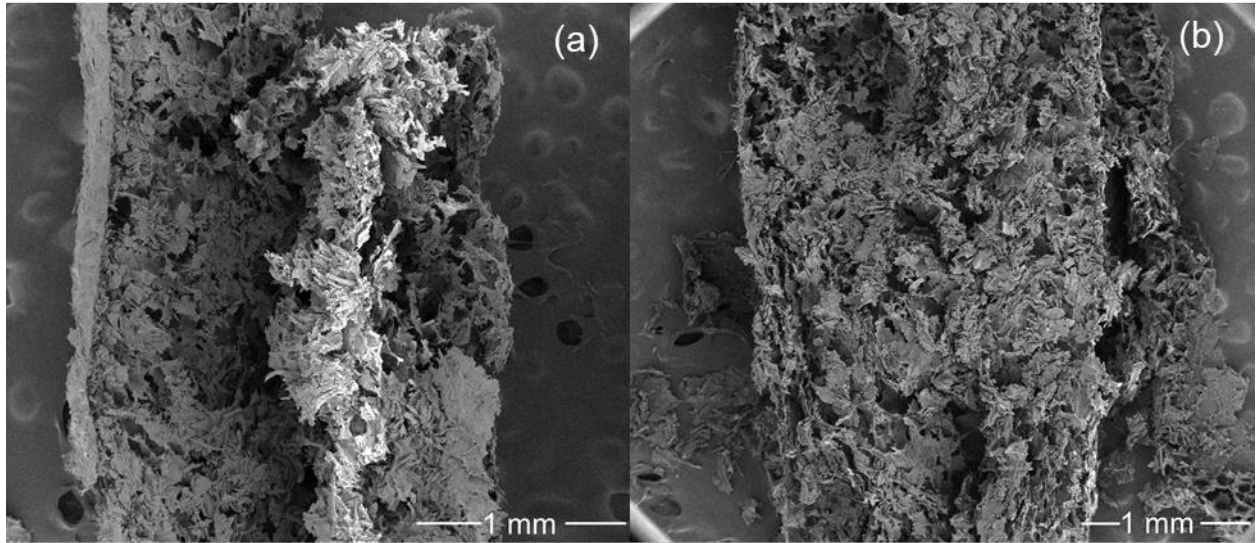

**SI Figure 7.** Cross-sectional SEM images of 1:1 composite, 50X (a), and [CHX][Ceph] loaded 1:1 composite, 40X (b).

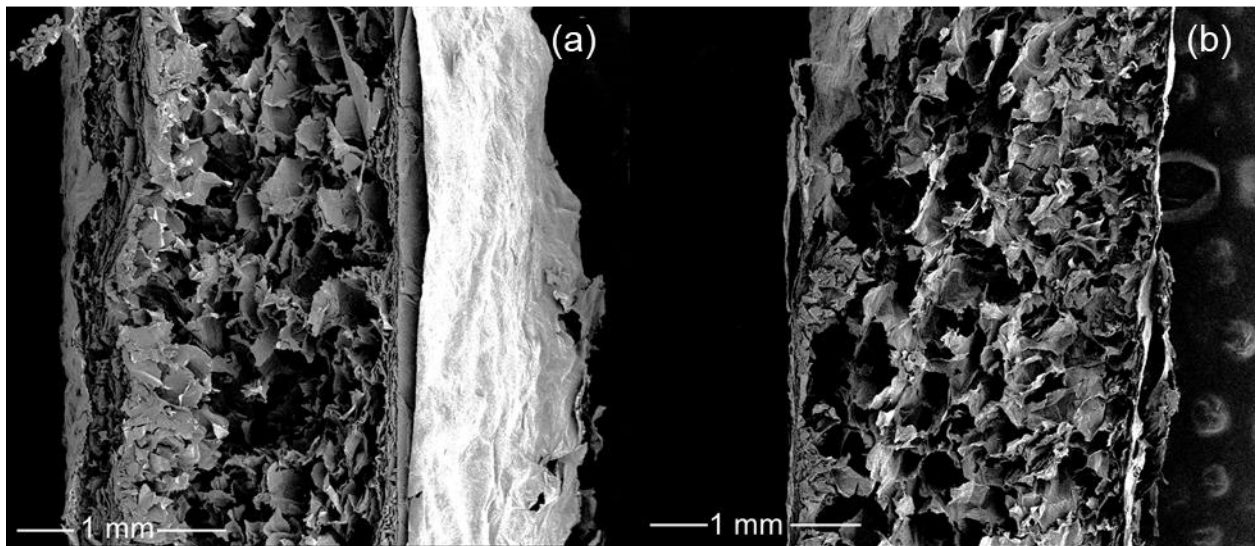

**SI Figure 8.** 50X Cross-sectional SEM images of 2:1 composite (a), and [CHX][Ceph] loaded 2:1 composite (b).

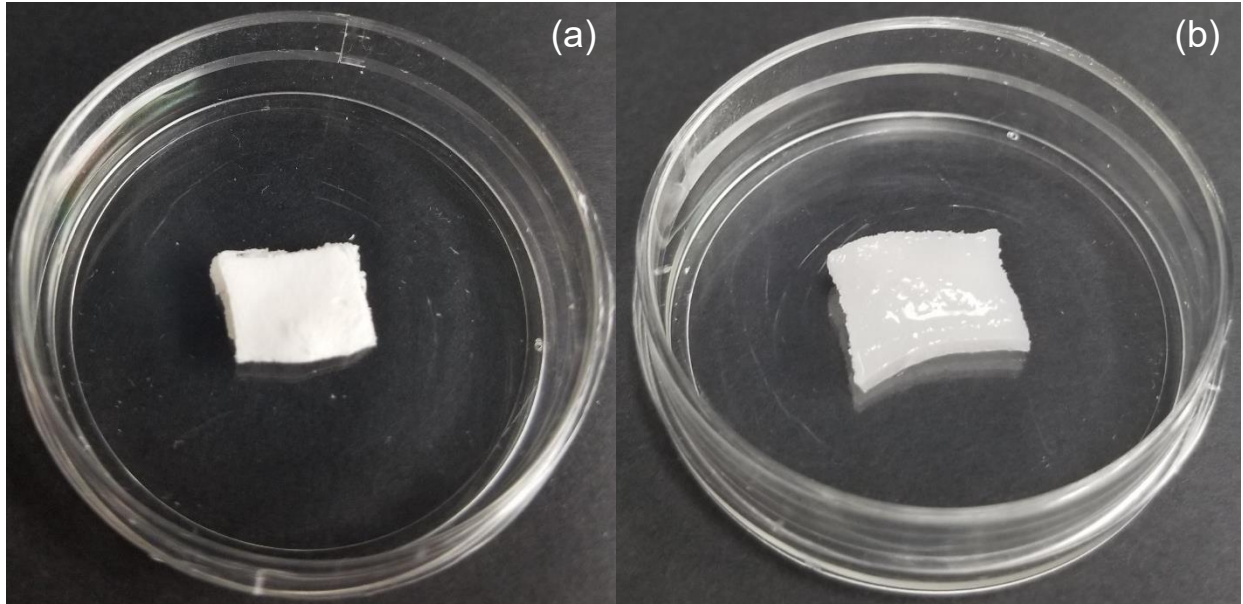

**SI Figure 9.** Dry 1:1 (HA:CEL) composite (a), and swollen 1:1 composite in 0.9% saline (b).

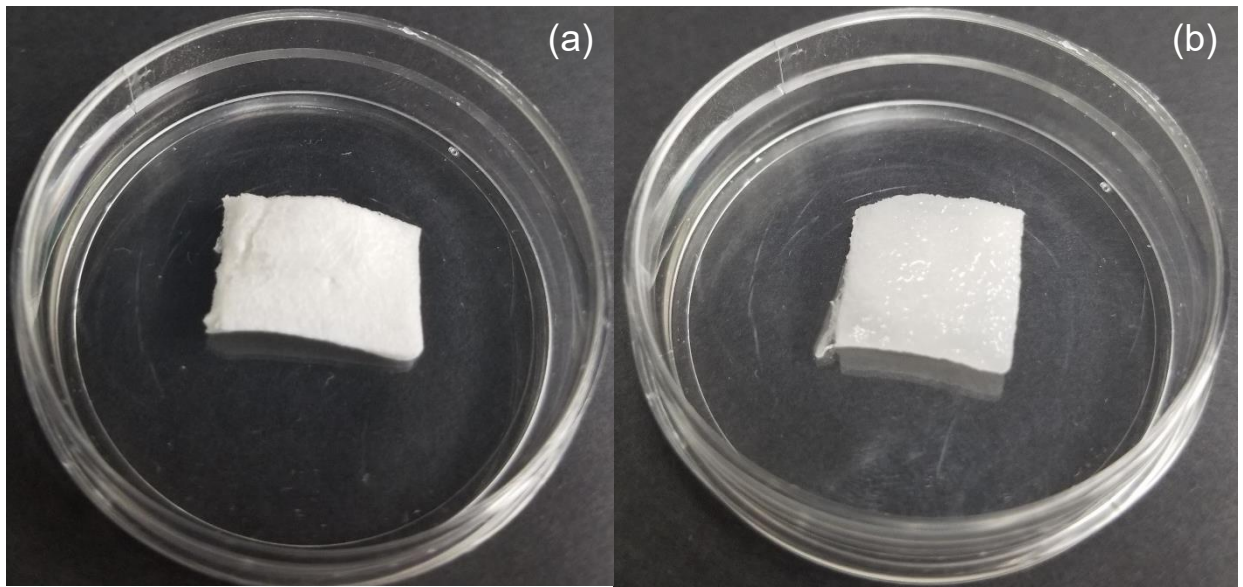

**SI Figure 10.** Dry 2:1 (HA:CEL) composite (a), and swollen 2:1 composite in 0.9% saline (b).

Photos taken by Kelsey M. Lopez.

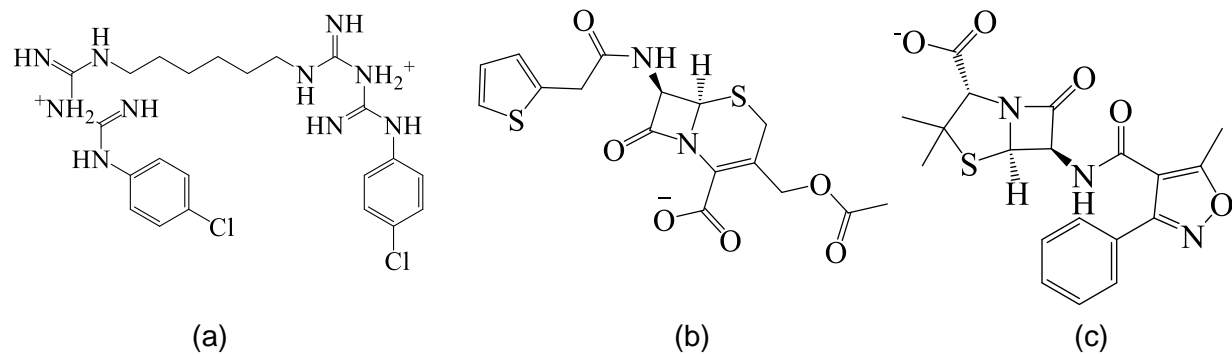

**SI Figure 11.** Structures of compounds used to synthesize GUMBOS. Chlorhexidine (a), cephalothin (b), and oxacillin (c).

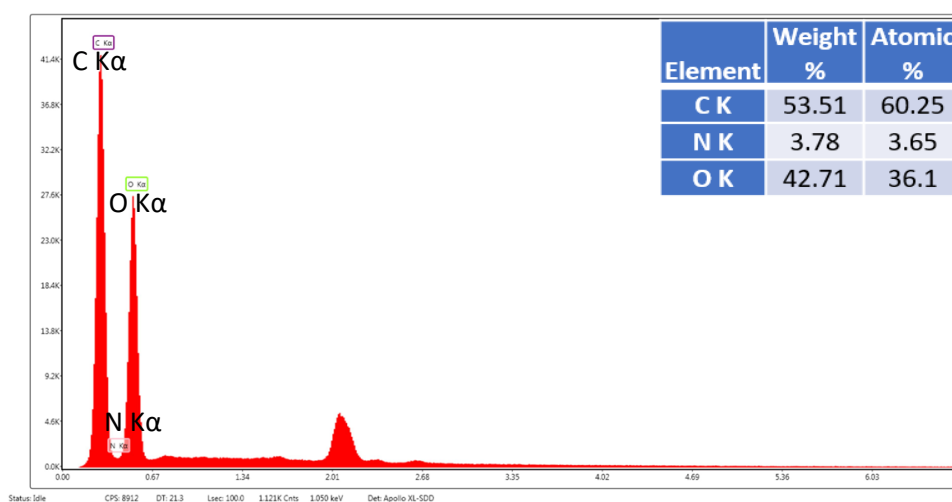

**SI Figure 12.** EDS spectrum of 1:1 HA:CEL composite.

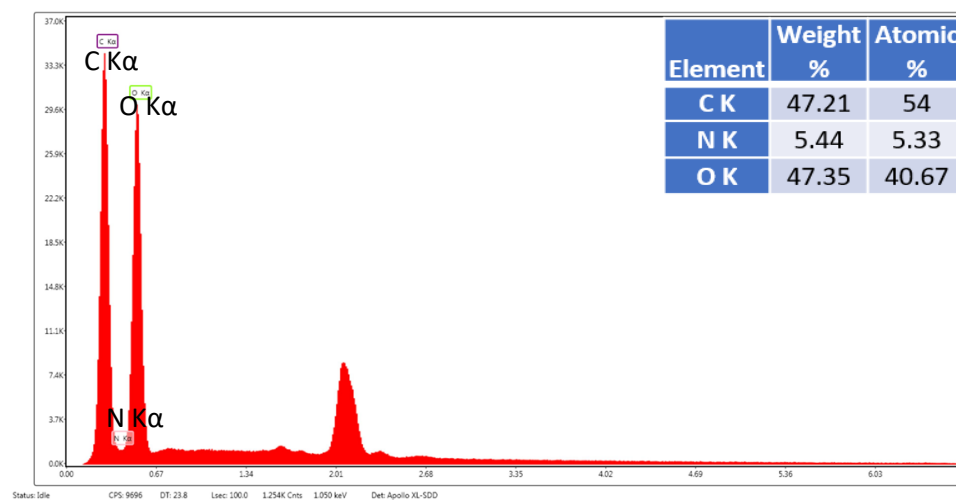

**SI Figure 13.** EDS spectrum of 2:1 HA:CEL composite.

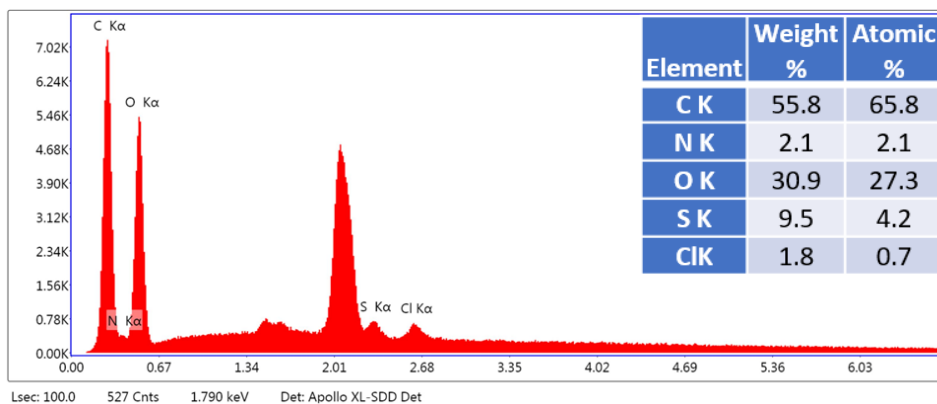

**SI Figure 14.** EDS spectrum of 1:1 composite drug-loaded with [CHX][Oxa] (100 μM).

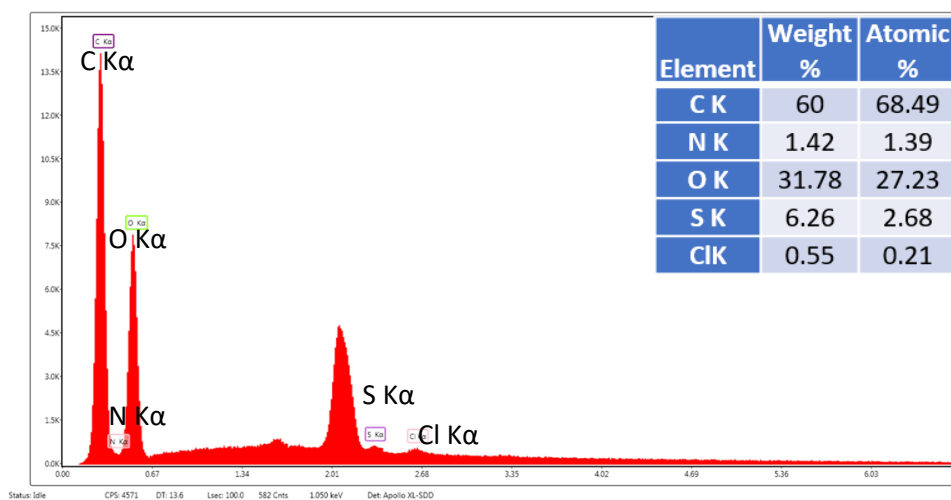

**SI Figure 15.** EDS spectrum of 2:1 composite drug-loaded with [CHX][Oxa] (100 μM).



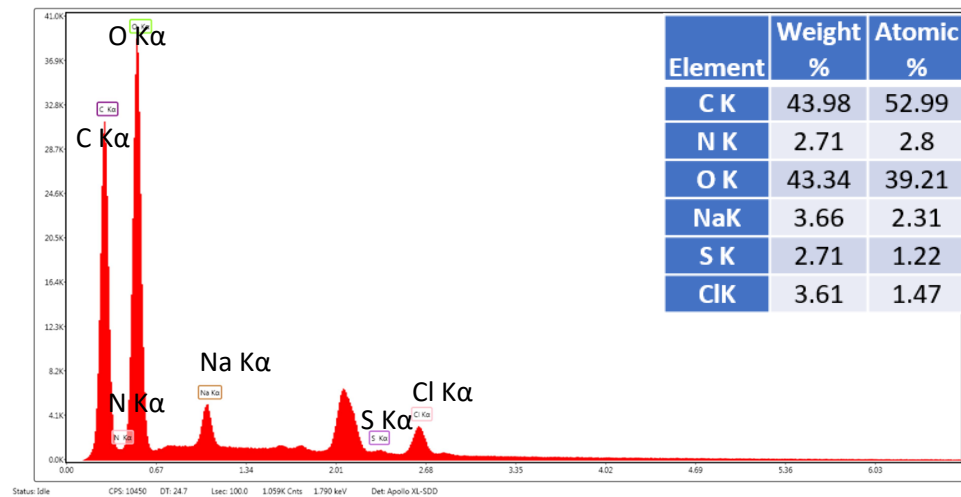

**SI Figure 16.** EDS spectrum of 2:1 drug-released composite (previously loaded with 100  $\mu\text{M}$  [CHX][Oxa]). Presence of Na and Cl from 0.9% saline solution.

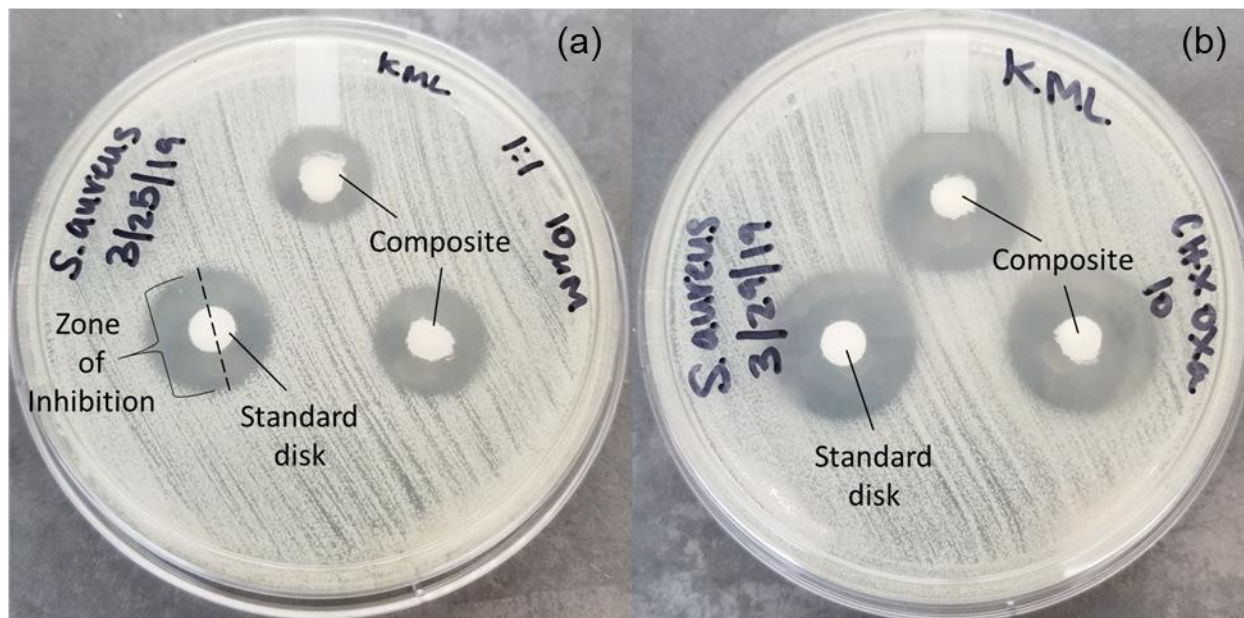

**SI Figure 17.** Representative images of composites and standard disks on agar plates after 20-24-hour incubation period; plates were inoculated with *S. aureus* (ATCC 29213). Circular areas where no bacteria have grown are called zones of inhibition (ZOI). 10  $\mu\text{M}$  [CHX][Ceph] loaded 1:1 composite (a), and 10  $\mu\text{M}$  [CHX][Oxa] loaded 1:1 composite (b).

Photo taken by Kelsey M. Lopez.
